# Supplementary material for: Dosimetric Evaluation of the Inter-Fraction Motion of Organs at Risk in SBRT for Nodal Oligometastatic Prostate Cancer
Source: MDPI journal article supplement (doi:10.3390/app122110949), 2022-10-28
Supplement: s1 [file s1]

## Supporting Materials

### Title: Dosimetric evaluation of the motion of inter-fraction organ and organs at risk in SBRT for nodal oligometastatic prostate cancer

Francesco La Fauci, Matteo Augugliaro, Giovanni Carlo Mazzola, Stefania Comi, Matteo Pepa, Mattia Zaffaroni, Maria Giulia Vincini, Giulia Corrao, Francesco Alessandro Mistretta, Stefano Luzzago, Cristiana Fodor, Gennaro Musi, Giuseppe Petralia, Ottavio De Cobelli, Roberto Orecchia, Federica Cattani, Giulia Marvaso and Barbara Alicja Jereczek-Fossa

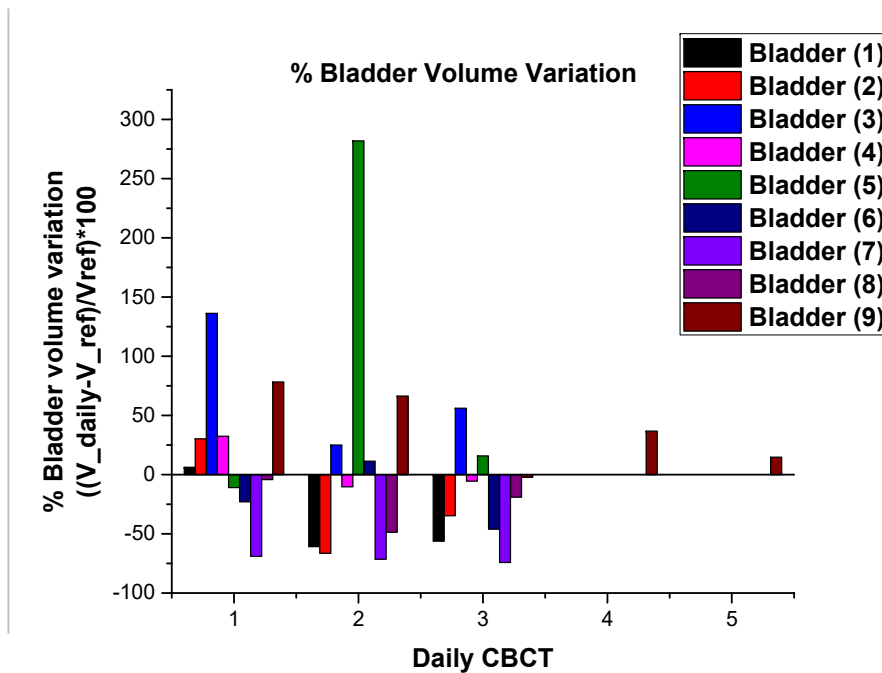

**Figure S1.** Bladder percentage volume variation express as  $((V_{\text{daily}} - V_{\text{ref}}) / V_{\text{ref}}) * 100$  for each available CBCTs (1 to 5).

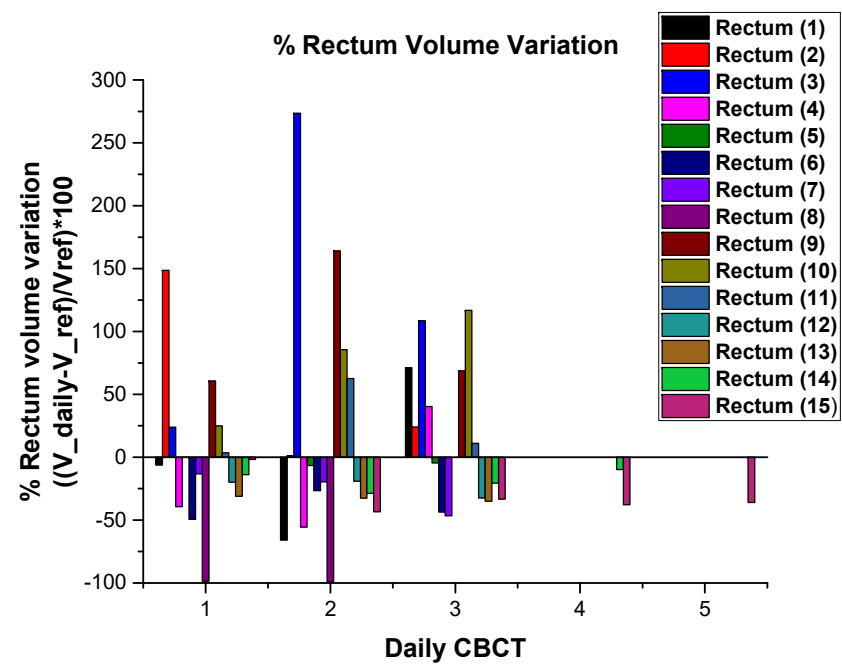

**Figure S2.** Rectum percentage volume variation express as  $((V_{\text{daily}} - V_{\text{ref}}) / V_{\text{ref}}) * 100$  for each available CBCTs (1 to 5).

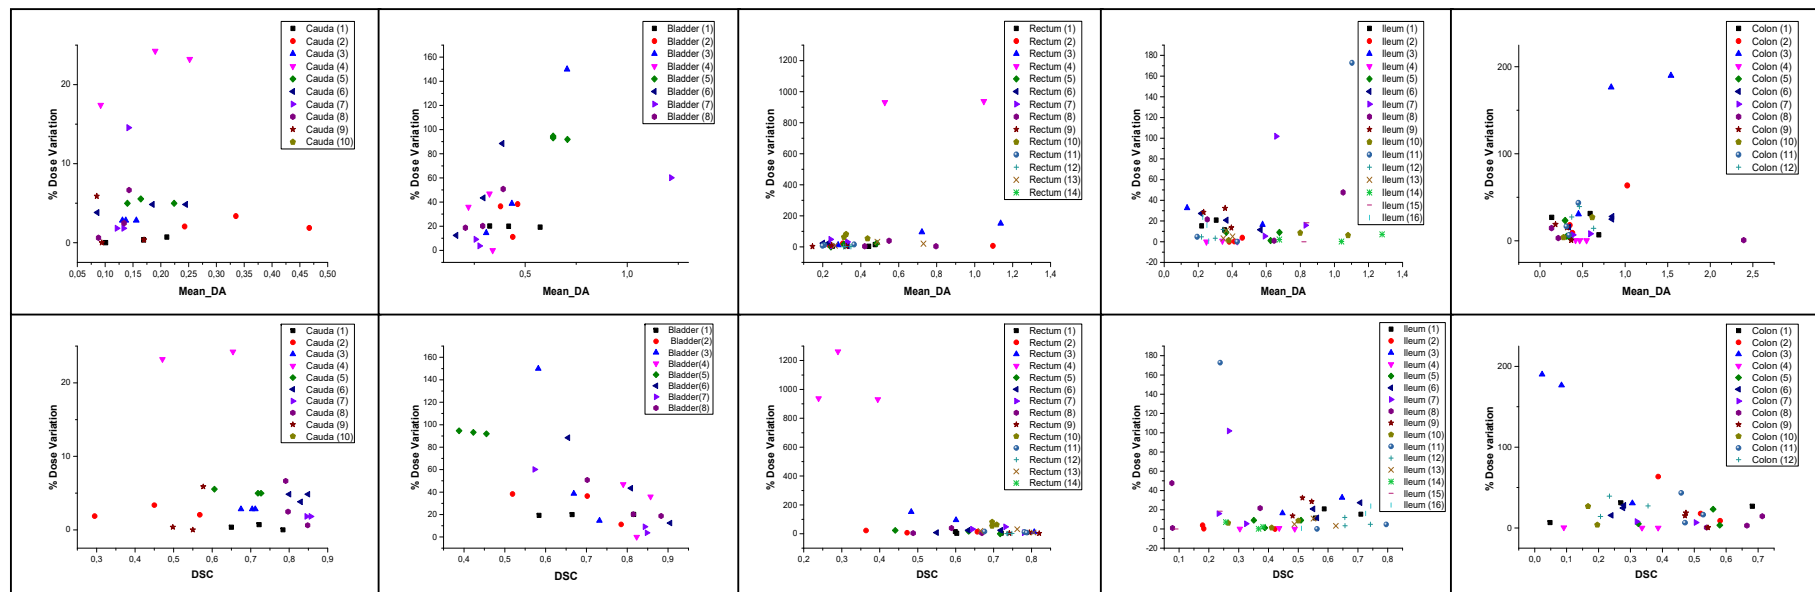

**Figure S3.** Percentage dose variation *vs* Mean\_DA (top) and DSC (bottom) for each OAR. The dose percentage variation increases with increasing Mean\_DA, and decreases with higher values of DSC.
